# Supplementary material for: miR‐155 induces ROS generation through downregulation of antioxidation‐related genes in mesenchymal stem cells
Source: PubMed Central journal article supplement (PMC5676067; doi:10.1111/acel.12680), 2017-10-02

# Supporting figure 1

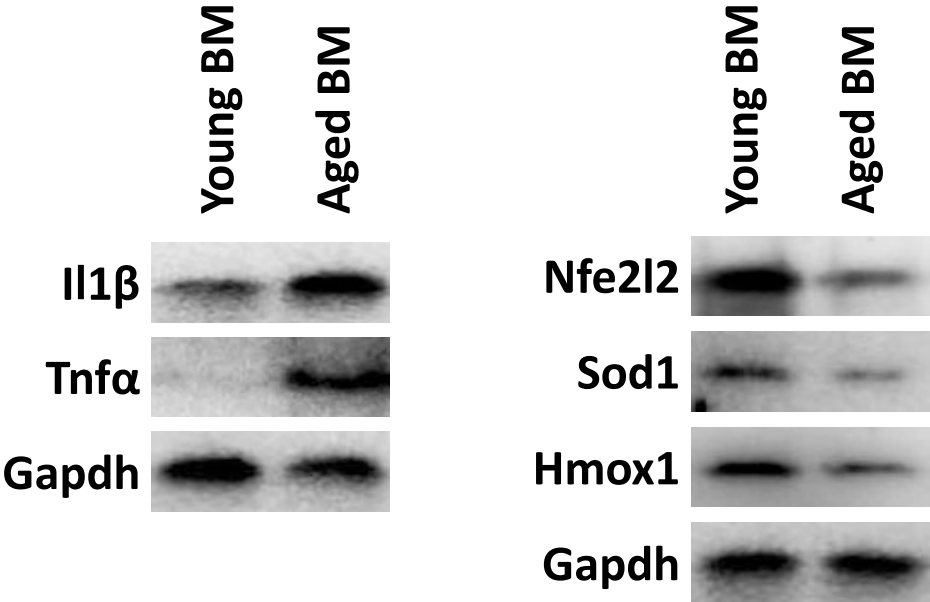

# Supporting figure 2

## *mmu-miR155-5p*

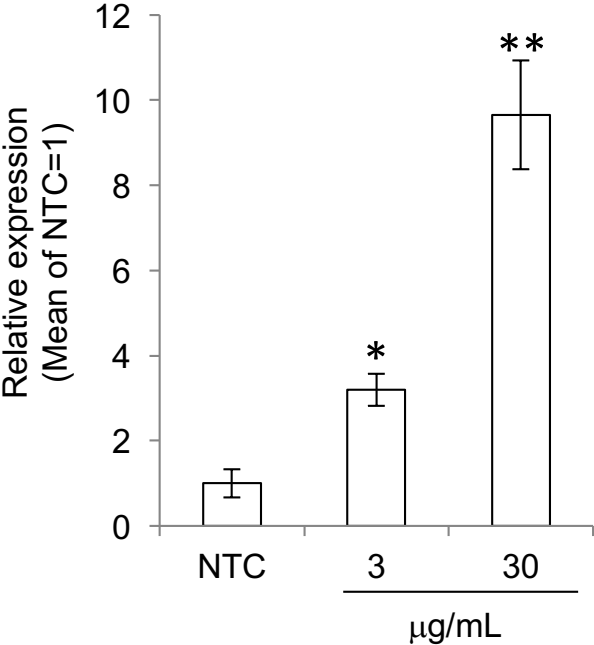

# Supporting figure 3

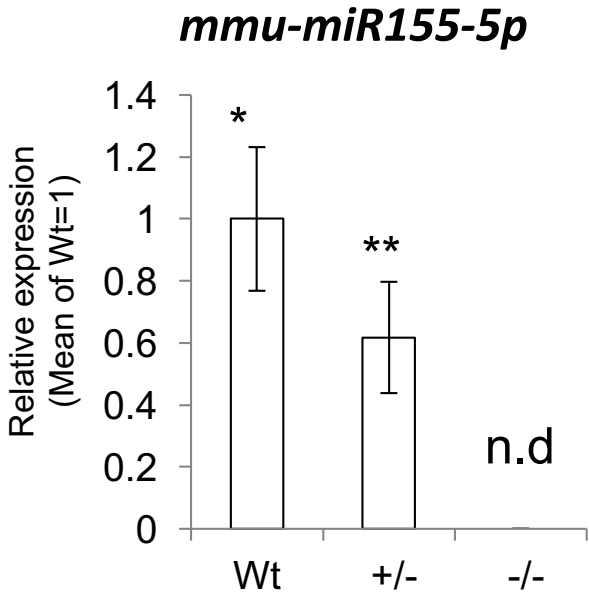

Supplement: ACEL-16-1369-s001.pdf [file ACEL-16-1369-s001.pdf]
